# Supplementary material
Source: ML conference proceedings conference paper supplement (https://openaccess.thecvf.com/content/ACCV2024/html/Adhikari_TuneVLSeg_Prompt_Tuning_ACCV_2024_paper.html)
Supplement: Supplementary file 1 [file Adhikari_TuneVLSeg_Prompt_Tuning_ACCV_2024_supplemental.pdf]

# Supplementary Material: TuneVLSeg

Rabin Adhikari<sup>✉</sup>, Safal Thapaliya<sup>✉</sup>, Manish Dhakal<sup>✉</sup>, and Bishesh Khanal<sup>✉</sup>

Nepal Applied Mathematics and Informatics Institute for research (NAAMII), Nepal  
{rabin.adhikari,safal.thapaliya,manish.dhakal,bishesh.khanal}@naamii.org.np

## A How does prompt depth affect Dice Score?

The scatter plot of test dice vs the prompt depth is shown in Fig. 1. We have also fitted a linear regression for the data and have shown  $R^2$  score for each context learner. There isn't a strong correlation between test dice and the prompt depth when the dice score, indicating that increasing prompt depth may not always increase the dice score for all the datasets and methods.

## B How does learning rate and weight decay affect Dice?

The scatter plot showing the test dice on different weight decays and learning rates is shown in Fig. 2. Although there doesn't seem to be a direct between weight decay and test dice nor learning rate and test dice, a learning rate of around  $10^{-3}$  seems to be a good starting point to train these context learners.

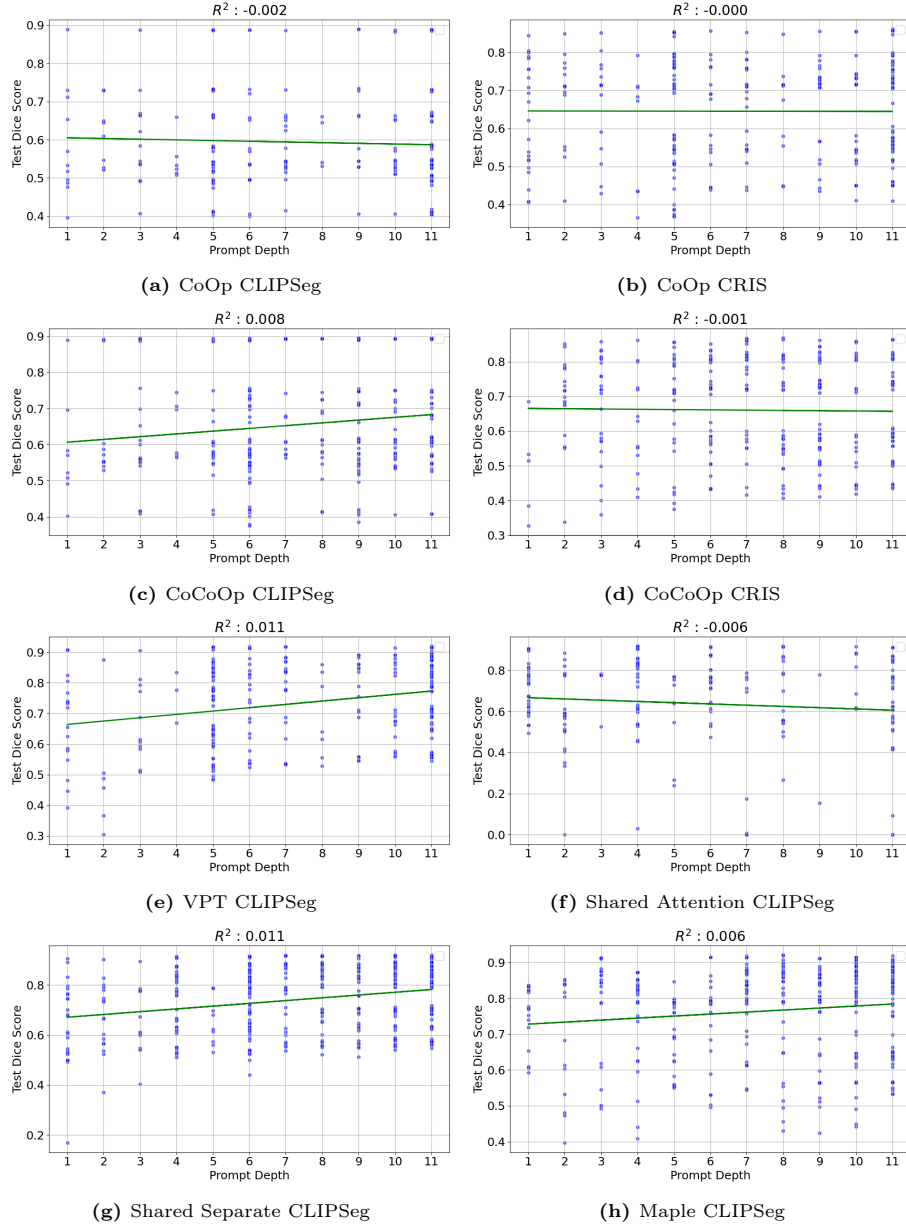

**Fig. 1:** Test Dice *vs.* Prompt Depth for Textual Tuning for all Datasets

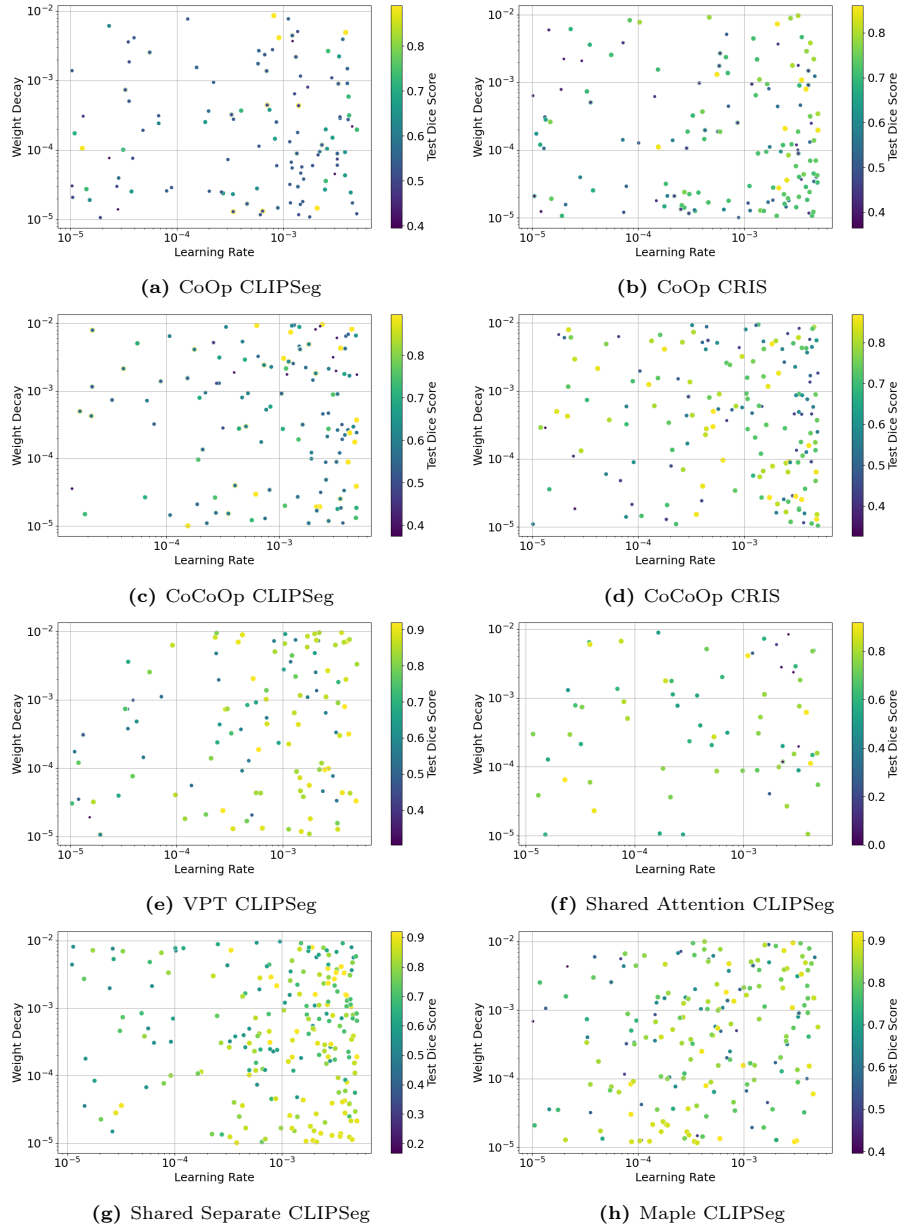

**Fig. 2:** Test Dice *vs.* Learning Rate *vs.* Weight Decay for all Datasets
